# Supplementary material
Source: PubMed Central journal article supplement (PMC2708848)
Supplement: supp_M808889200_Appendix-Han.pdf [file supp_M808889200_Appendix-Han.pdf]

**Appendix 1. The binding constants of NNI binding to NS5B570-Con1 measured by Surface Plasmon Resonance <sup>a</sup>**

| Compound | $k_{on}$ ( $M^{-1} s^{-1}$ ) | $k_{off}$ ( $s^{-1}$ ) | $t_{1/2}$ (min) | $K_d$ [ $\mu M$ ] |
|----------|------------------------------|------------------------|-----------------|-------------------|
| NNI-1    | $1.7 \times 10^6$            | 0.023                  | 0.5             | 0.01              |
| HCV-796  | $2.9 \times 10^4$            | $7.9 \times 10^{-4}$   | 15              | 0.02              |
| NNI-3    | $2.9 \times 10^6$            | 0.026                  | 0.4             | 0.01              |
| NNI-4    | $7.7 \times 10^3$            | 0.010                  | 1.2             | 0.2               |

<sup>a</sup> The Biacore S51 biosensor (BIACORE Life Sciences, Uppsala, Sweden) was used to determine the compound binding parameters as described (20).

1) Change the footnote of Appendix 1 to below:

<sup>a</sup> Data obtained with a Biacore S51 biosensor (GE Healthcare) as previously described (20).

2) Addition of Appendix 2:

**Appendix 2. Method of SPR binding experiments**

SPR (surface plasmon resonance) assays were performed similarly to (20) but with the following modifications. Both NS5B570-Con1 and NS5B750-BK proteins were coupled to a sensor chip using standard amine coupling (Biacore manual, GE Healthcare). Briefly, aliquots (5  $\mu$ l of 5 mg/ml) of either NS5B570-Con1 or NS5B750-BK were rapidly diluted with 150  $\mu$ l of 50 mM MES pH 6.0, 50 mM NaCl, and 10 mM MgCl<sub>2</sub> and immediately injected for five minutes over an activated CM5 chip surface at 10  $\mu$ l/min and blocked immediately with a 1:1 mix of running buffer (50 mM Hepes pH 8.0, 150 mM NaCl, 10 mM MgCl<sub>2</sub>, 5 mM DTT) and 1 M ethanolamine. This resulted in surfaces coupled with 10,000-15,000 RUs of NS5B with > 90% the expected compound binding capacity. Compound preparation, data collection, data reduction, and fitting were carried out as described in (20).
