# Supplementary material
Source: PubMed Central journal article supplement (PMC2708848)
Supplement: supp_M808889200_Appendix.pdf [file supp_M808889200_Appendix.pdf]

**Appendix. The binding constants of NNI binding to NS5B570-Con1 measured by Surface Plasmon Resonance <sup>a</sup>**

| Compound | $k_{on}$ ( $M^{-1} s^{-1}$ ) | $k_{off}$ ( $s^{-1}$ ) | $t_{1/2}$ (min) | $K_d$ [ $\mu M$ ] |
|----------|------------------------------|------------------------|-----------------|-------------------|
| NNI-1    | $1.7 \times 10^6$            | 0.023                  | 0.5             | 0.01              |
| HCV-796  | $2.9 \times 10^4$            | $7.9 \times 10^{-4}$   | 15              | 0.02              |
| NNI-3    | $2.9 \times 10^6$            | 0.026                  | 0.4             | 0.01              |
| NNI-4    | $7.7 \times 10^3$            | 0.010                  | 1.2             | 0.2               |

<sup>a</sup> The Biacore S51 biosensor (BIACORE Life Sciences, Uppsala, Sweden) was use to determine the compound binding parameters as described (20).
